# Supplementary material
Source: HighWire-hosted journal article supplement (https://tobaccocontrol.bmj.com/content/tobaccocontrol-2020-055758)
Supplement: inline-supplementary-material-4 [file inline-supplementary-material-4.pdf]

**Appendix Table A4. Regression results by initial conditions and country specific linear time trends**

|                                      | (1)              | (2)              | (3)              |
|--------------------------------------|------------------|------------------|------------------|
|                                      | MPOWER           | Tax              | MPOWE & Tax      |
| L. MPOWER Score                      | -0.263***        |                  |                  |
| <i>High MPOWER – High Prevalence</i> | (-0.333, -0.192) |                  |                  |
|                                      | -0.348**         |                  |                  |
| <i>High MPOWER – Low Prevalence</i>  | (-0.621, -0.075) |                  |                  |
|                                      | 0.222            |                  |                  |
| <i>Low MPOWER – Low Prevalence</i>   | (-0.149, 0.593)  |                  |                  |
|                                      | -0.221           |                  |                  |
| <i>Low MPOWER – High Prevalence</i>  | (-0.692, 0.250)  |                  |                  |
| L. Tax Rate                          |                  | -0.073           | -0.056           |
| <i>High MPOWER – High Prevalence</i> |                  | (-0.216, 0.070)  | (-0.199, 0.086)  |
|                                      |                  | 0.101            | 0.125            |
| <i>High MPOWER – Low Prevalence</i>  |                  | (-0.128, 0.331)  | (-0.084, 0.335)  |
|                                      |                  | -0.112**         | -0.117***        |
| <i>Low MPOWER – Low Prevalence</i>   |                  | (-0.204, -0.019) | (-0.187, -0.047) |
|                                      |                  | -0.115           | -0.134           |
| <i>Low MPOWER – High Prevalence</i>  |                  | (-0.311, 0.082)  | (-0.341, 0.073)  |
| L. MPOWE Score                       |                  |                  | -0.193***        |
| <i>High MPOWER – High Prevalence</i> |                  |                  | (-0.290, -0.096) |
|                                      |                  |                  | -0.426***        |
| <i>High MPOWER – Low Prevalence</i>  |                  |                  | (-0.660, -0.193) |
|                                      |                  |                  | 0.304*           |
| <i>Low MPOWER – Low Prevalence</i>   |                  |                  | (-0.061, 0.670)  |
|                                      |                  |                  | -0.260           |
| <i>Low MPOWER – High Prevalence</i>  |                  |                  | (-0.675, 0.155)  |
| Observations                         | 570              | 570              | 570              |
| Number of countries                  | 117              | 117              | 117              |
| Year Fixed Effect                    | Yes              | Yes              | Yes              |
| Country Fixed Effect                 | Yes              | Yes              | Yes              |
| Country-specific Linear Time Trend   | Yes              | Yes              | Yes              |

Note: 95% confidence intervals in parentheses. \*\*\* p<0.01, \*\* p<0.05, \* p<0.10. By definition, MPOWE score respectively excluding E, O, and P ranges from 4 to 24, excluding W ranges from 4 to 19, and excluding M ranges from 4 to 25. The regression sample includes countries for which at least 2010 and 2018 prevalence, and 2008 and 2016 MPOWER and tax measures are available. Standard errors are clustered at WHO region – initial condition level.
